# Supplementary material
Source: PubMed Central journal article supplement (PMC5800833)

**Online Supplemental Materials**

**Supplementary Table 1.** Comparisons of HDL cholesterol (HDL-C) and ApoAI levels between diabetics and non-diabetics subjects, with and without adjustment for sex. Statistics presented as Pearson's correlation (95% CI).

| Measure | Unadjusted Mean Difference (95% CI) | Unadjusted P-value | Adjusted Mean Difference (95% CI) | Adjusted P-value |
|---------|-------------------------------------|--------------------|-----------------------------------|------------------|
| HDL-C   | -3.69(-16.91,9.52)                  | 0.56               | -3.76(-17.53,10.00)               | 0.57             |
| ApoAI   | 4.42(-14.87,23.70)                  | 0.63               | 4.04(-15.70,23.78)                | 0.67             |

**Supplementary Table 2.** Correlation of total and ABCA-independent cholesterol efflux with hyperglycemia (HbA<sub>1c</sub>) and ApoAI glycation at Lys-12 and Lys-133 residues. Statistics presented as Pearson's correlation (95% CI).

| Cholesterol Efflux | <i>HbA<sub>1c</sub></i> |          | <i>Lys-12 Glycation</i> |          | <i>Lys-133 Glycation</i> |          |
|--------------------|-------------------------|----------|-------------------------|----------|--------------------------|----------|
|                    | <i>r</i>                | <i>P</i> | <i>r</i>                | <i>P</i> | <i>r</i>                 | <i>P</i> |
| Total efflux       | -0.28                   | 0.03     | -0.53                   | 0.001    | -0.13                    | 0.16     |
| ABCA1-independent  | -0.07                   | 0.31     | -0.22                   | 0.06     | -0.01                    | 0.70     |

HbA<sub>1c</sub>: glycated hemoglobin, ABCA1: ATP-binding cassette (ABC) family transporter.

**Supplementary Table 3.** Comparisons of the fractional catabolic rates (FCRs) of ApoAI, ApoAI glycation and HDL functions between T2DM patients and healthy controls with adjustment for HbA<sub>1c</sub>. The parameters that were not different after the adjustment for HbA<sub>1c</sub> are highlighted in bold.

| Measure                                                      | Unadjusted Mean Difference (95% CI) | Unadjusted P-Value | Adjusted Mean Difference (95% CI) | Adjusted P-Value |
|--------------------------------------------------------------|-------------------------------------|--------------------|-----------------------------------|------------------|
| <b>Fractional catabolic rate of ApoAI</b>                    |                                     |                    |                                   |                  |
| ApoAI                                                        | 0.01 (0.00,0.01)                    | <b>&lt;0.001</b>   | 0.01 (0.00,0.01)                  | <b>0.031</b>     |
| <b>Glycation measures at different lysine sites of ApoAI</b> |                                     |                    |                                   |                  |
| logApoA1K133                                                 | 0.25 (-0.00,0.50)                   | <b>0.054</b>       | 0.39 (-0.09,0.88)                 | <b>0.100</b>     |
| logApoA1K12                                                  | 0.25 (0.15,0.36)                    | <b>&lt;0.001</b>   | 0.10 (-0.08,0.27)                 | <b>0.240</b>     |
| logApoA1K205                                                 | 0.71 (0.13,1.30)                    | <b>0.021</b>       | 0.88 (-0.26,2.01)                 | <b>0.120</b>     |
| logApoA1K96                                                  | 0.01 (-0.29,0.30)                   | 0.960              | -0.04 (-0.61,0.53)                | 0.880            |
| <b>HDL function</b>                                          |                                     |                    |                                   |                  |
| PON1                                                         | -97.14 (-159.02,-35.27)             | <b>0.005</b>       | -55.76 (-173.58,62.06)            | <b>0.33</b>      |
| ABCA1-independent                                            | -1.15 (-2.43,0.13)                  | 0.074              | -2.20 (-4.65,0.26)                | 0.075            |
| Total efflux                                                 | -2.31 (-3.66,-0.95)                 | <b>0.002</b>       | -2.98 (-5.64,-0.32)               | <b>0.031</b>     |
| ABCA1-dependent                                              | -1.16 (-1.90,-0.43)                 | <b>0.004</b>       | -0.81 (-2.26,0.64)                | <b>0.250</b>     |

FCR: fractional catabolic rate, ApoA1K12: ApoAI glycation at lysine 12 site, ApoA1K96: ApoAI glycation at lysine 96 site ApoA1K133: ApoAI glycation at lysine 133 site, ApoA1K205: ApoAI glycation at lysine 205 site HbA<sub>1c</sub>: glycated hemoglobin; HDL: high density lipoprotein, PON1: paraoxonase 1.

**Supplementary Table 4.** List of the proteins associated with ApoAI. Two identical sodium dodecyl sulfate polyacrylamide gel electrophoresis (SDS-PAGEs) were performed for ApoAI-specific Western blotting and proteomics analysis. Based on the molecular weight markers and Western blot analysis matching, corresponding silver-stained gel bands containing ApoAI were analyzed by mass spectrometry. Proteins identified in each band are check marked.

| Accession Number | Gene Name | Protein Name                                 | Molecular Weight (kDa) | Control |        |        | T2DM   |        |        |
|------------------|-----------|----------------------------------------------|------------------------|---------|--------|--------|--------|--------|--------|
|                  |           |                                              |                        | 27 kDa  | 50 kDa | 75 kDa | 27 kDa | 50 kDa | 75 kDa |
| P01009           | A1AT      | Alpha-1-antitrypsin                          | 47                     |         | √      |        |        | √      | √      |
| P01008           | ANT3      | Antithrombin-III                             | 53                     |         | √      |        | √      | √      | √      |
| P02647           | APOA1     | Apolipoprotein A-I                           | 31                     | √       | √      | √      | √      | √      | √      |
| P04114           | APOB      | Apolipoprotein B-100                         | 516                    |         | √      |        | √      | √      | √      |
| P02649           | APOE      | Apolipoprotein E                             | 36                     |         |        | √      |        | √      |        |
| P01857           | IGHG1     | Immunoglobulin heavy constant gamma 1        | 36                     |         | √      |        |        | √      | √      |
| P01871           | IGHM      | Immunoglobulin heavy constant mu             | 49                     |         | √      |        | √      | √      | √      |
| Q14624           | ITIH4     | Inter-alpha-trypsin inhibitor heavy chain H4 | 103                    |         |        | √      | √      | √      | √      |
| P02768           | ALBU      | Serum albumin                                | 69                     |         | √      | √      | √      | √      | √      |
| P04004           | VTNC      | Vitronectin                                  | 54                     |         | √      |        | √      | √      | √      |
| P02765           | FETUA     | Alpha-2-HS-glycoprotein                      | 39                     |         | √      |        |        |        |        |
| P06727           | APOA4     | Apolipoprotein A-IV                          | 45                     |         |        | √      |        |        |        |
| P05090           | APOD      | Apolipoprotein D                             | 21                     |         |        | √      |        |        |        |
| O95445           | APOM      | Apolipoprotein M                             | 21                     |         |        | √      |        |        |        |
| P04217           | A1BG      | Alpha-1B-glycoprotein                        | 54                     |         |        |        |        |        | √      |
| P08697           | A2AP      | Alpha-2-antiplasmin                          | 55                     |         |        |        |        | √      | √      |
| P01023           | A2MG      | Alpha-2-macroglobulin                        | 163                    |         |        |        |        | √      | √      |
| P04003           | C4BPA     | C4b-binding protein alpha chain              | 67                     |         |        |        | √      | √      | √      |
| P09871           | C1S       | Complement C1s subcomponent                  | 77                     |         |        |        |        | √      |        |
| P01024           | CO3       | Complement C3                                | 187                    |         |        |        | √      | √      | √      |
| P0C0L4           | CO4A      | Complement C4-A                              | 193                    |         |        |        | √      | √      | √      |
| P06396           | GELS      | Gelsolin                                     | 86                     |         |        |        |        | √      |        |
| P05546           | HEP2      | Heparin cofactor 2                           | 57                     |         |        |        | √      | √      | √      |
| P04196           | HRG       | Histidine-rich glycoprotein                  | 60                     |         |        |        |        |        | √      |
| P19823           | ITIH2     | Inter-alpha-trypsin inhibitor heavy chain H2 | 106                    |         |        |        |        |        | √      |
| P55058           | PLTP      | Phospholipid transfer protein                | 55                     |         |        |        | √      | √      | √      |
| P00747           | PLMN      | Plasminogen                                  | 91                     |         |        |        |        | √      |        |
| P00734           | THRB      | Prothrombin                                  | 70                     |         |        |        | √      | √      | √      |
| P02787           | TRFE      | Serotransferrin                              | 77                     |         |        |        |        | √      | √      |

**Supplementary Figure 1.**  $^2\text{H}$ -labeling of native and glycosylated ApoAI analyzed by mass spectrometry. ApoB100-depleted plasma samples from a patient with type 2 diabetes at the baseline and after 4 days of  $^2\text{H}_2\text{O}$  labeling experiment were digested with trypsin and analyzed by high resolution mass spectrometry. To illustrate the changes in isotope distribution, the heavy isotopomers ( $M_1$ - $M_3$ ) were normalized relative to  $M_0$ . After 4 days of  $^2\text{H}_2\text{O}$  labeling, the intensities of heavy isotopomers, in particular  $M_1$ , were increased relative to monoisotopic peak in both non-glycosylated VSFLSALEEYTK (**A**) and glycosylated  $\text{Q}^{\text{Gly}}\text{KLHELQEK}$  (**B**) ApoAI peptides. However, the extent of the increase in the glycosylated peptide was substantially higher than in the non-glycosylated peptide, indicating that the glycosylated peptide has higher turnover rate and shorter half-life.

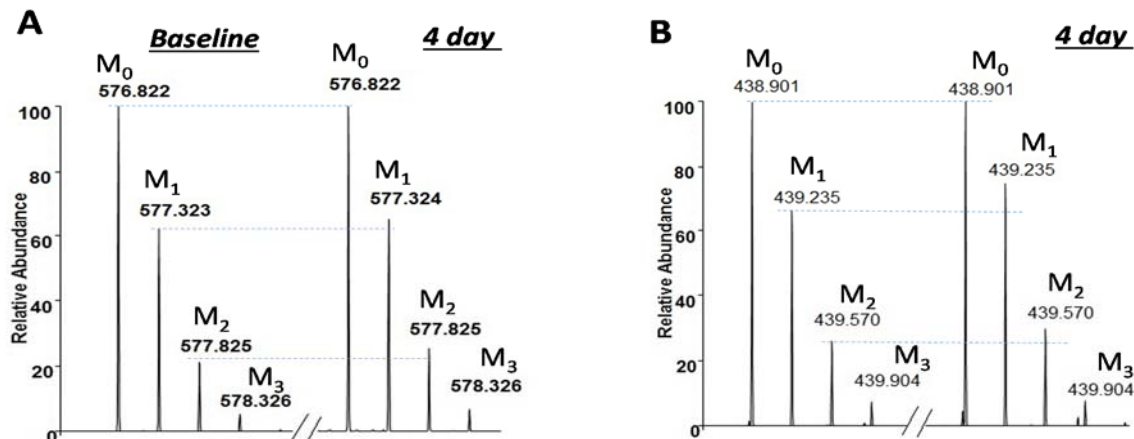

Supplement: jc.2017-01551.sd1.pdf [file jc.2017-01551.sd1.pdf]
